# Supplementary material for: Acceptability and Usability of the Family Gene Toolkit for Swiss and Korean Families Harboring BRCA1/BRAC2 Pathogenic Variants: A Web-Based Platform for Cascade Genetic Testing
Source: MDPI journal article supplement (doi:10.3390/cancers15184485), 2023-09-09

# Examples of the interface and context of the web-based platform

## I. German version

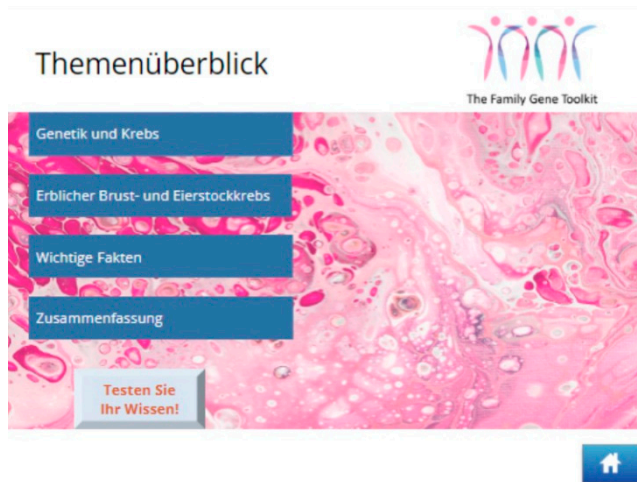

### Quiz

Alle Veränderungen in der DNA sind schädlich und verursachen Krankheiten.

- ☐ Richtig  
☐ Falsch

Absenden

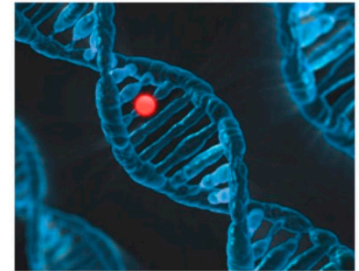

### Genetik

Der menschliche Körper besteht aus Milliarden von Zellen. In jeder dieser Zellen gibt es **23 Chromosomenpaare**; 23 stammen von der Mutter und 23 vom Vater. Gene sind in Chromosomen enthalten. Daher kommen **Gene auch paarweise vor**.

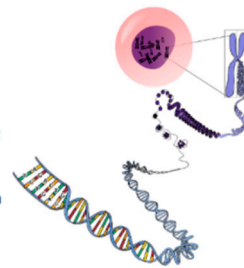

**Jedes Gen hat eine bestimmte Aufgabe im menschlichen Körper.** Der Mensch hat etwa 20'000- 25'000 Gene. Gene werden aus DNA hergestellt.

## II. French version

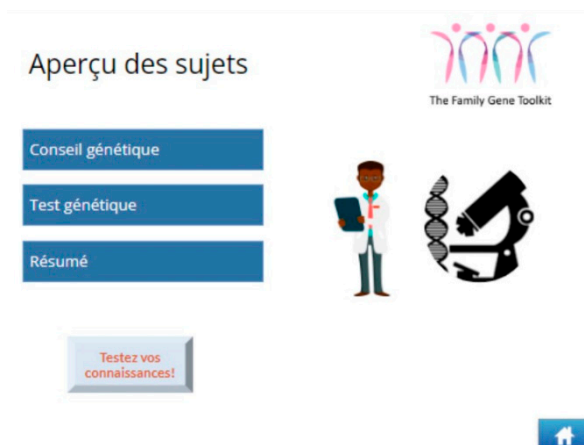

Cliquez sur une icône verte pour connaître votre risque d'avoir une mutation, si un autre parent l'a

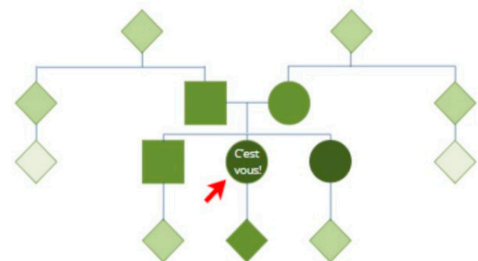

## Que se passe-t-il pendant un conseil génétique?

Cliquez sur un bouton pour en savoir plus sur les étapes des tests génétiques

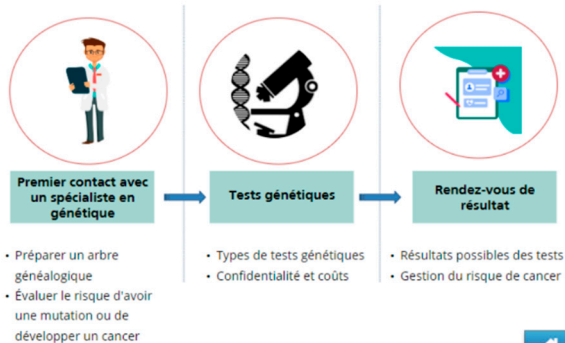

## Quiz

Si une femme est identifiée comme porteur d'une mutation du gène *BRCA2*, un test génétique ciblé sera proposé à son frère.

☒ Vrai

☐ Faux

Soumettre

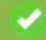

Vrai

Les tests génétiques ciblés recherchent la même mutation que celle qui a été identifiée chez le parent. Les tests ciblés sont environ 10 fois moins chers que les tests de panels de gènes.

Suivant

## III. Italian version

### Panoramica degli argomenti

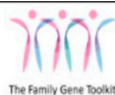

The Family Gene Toolkit

Coping con il rischio di sviluppare un tumore

Modi per far fronte al rischio di sviluppare un tumore

Sommario

### Prendere l'iniziativa

Clicchi qui per la storia

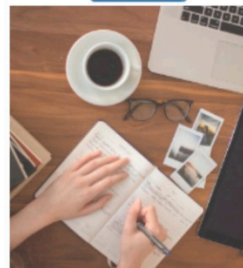

Il coping attivo comporta il prendere l'iniziativa.

Ciò significa scoprire i fatti e prendersi il tempo necessario per elaborare le informazioni

- raccogliere le informazioni per tempo, in modo da avere il tempo necessario per elaborare la notizia
- chiedere ulteriori consulenze per chiarire le ambiguità
- scrivere [l'elenco delle domande](#) che si desidera porre al proprio medico curante
- recarsi al consulto con un familiare o un amico fidato, prendere appunti e programmare di esaminarli insieme

### Perché il coping attivo è utile?

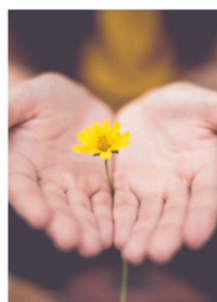

L'utilizzo delle strategie di coping utili può aiutare a:

- Accettare la diagnosi della mutazione patogena
- Accettare una diagnosi di tumore
- Prendere decisioni ben informate sulla gestione del rischio di tumore
- Minimizzare i sentimenti negativi
- Ridurre l'incertezza sul futuro
- Ridurre la pressione sulla famiglia

## IV. English version

### Overview

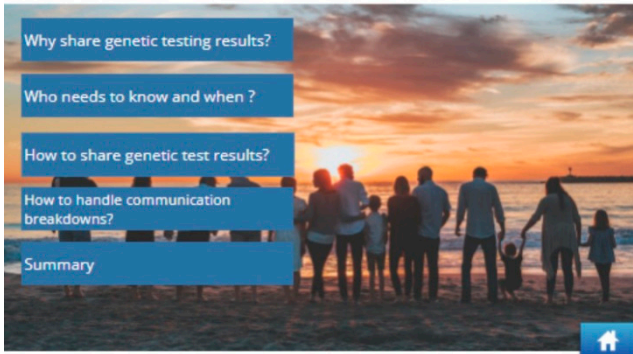

- Why share genetic testing results?
- Who needs to know and when ?
- How to share genetic test results?
- How to handle communication breakdowns?
- Summary



### When to share genetic testing results?

**There is no perfect time**

- Some prefer to share test results right away
- Others may wait for a specific event, such as a family gathering

**Waiting too long could make it harder to tell**

[Click here for a story](#)



### Summary

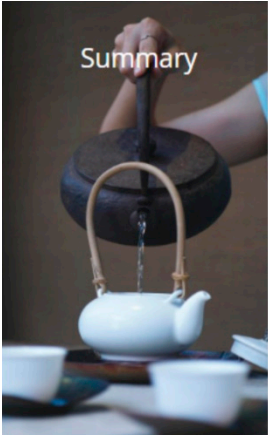



- Sharing genetic test results with your relatives is the **right thing to do**
- Ask your genetic specialist to **help** you in this process
- Respect your relatives' decision** about what to do with this information
- If you need more information, you can find a [genetic specialist](#) in your area

## V. Korean version

### 개요



- 암 위험 관리
- 요약
- 퀴즈!



암 위험 관리에 대해 자세히 알아보려면, 사진을 클릭하십시오.



검진



예방 약물



위험 감소를 위한 예방적 수술



건강한 생활양식

## 퀴즈

선별검사(암 조기 검진)를 받는 것과 위험감소를 위한 치료를 받는 것은 *BRCA1* 또는 *BRCA2* 병인성 변이가 있는 모든 남성과 여성에게 적용된다.

☐ 참

☒ 거짓

제출하기

정답

선별검사를 받는 것과 위험 감소를 위한 치료를 받는 것은 모든 남성과 여성에게 적용되는 것은 아닙니다. 선별검사는 특정 병인성 변이, 성별, 그리고 다른 건강 상태에 따라 달라집니다. 또한 개인적인 상황, 선호도, 가치관에 따라 달라질 수 있습니다. 유전학 전문가는 다른 선택지를 제시할 수도 있고, 개인별 가장 좋은 선택지가 무엇인지 결정하도록 도울 수 있습니다.

계속하기

## 요약

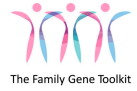

의학적 지침(조기 발견, 위험 감소 예방적 수술, 약물 복용)과 건강한 생활 양식의 조합은 궁극적으로 암 위험을 줄일 수 있습니다.

## 신체활동

성인은 주1회 신체활동(운동)에 참여할 것을 권장합니다.

- *BRCA* 보인자에서 적당한 운동은 유방암의 위험 감소
- 일주일에 적어도 3번 이상, 하루에 30분 이상 땀이 날 정도의 운동은 유방암 위험 감소

장시간 앉아 있거나 누워 있는 것, TV 또는 스마트폰 등 화면 기반 엔터테인먼트를 보는 것을 제한합니다.

예를 보려면,  
여기를 클릭  
하십시오.

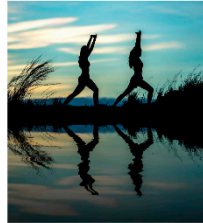

Supplement: s1 [file s1]
